# Supplementary material for: Anticancer Activity of Urease Mimetic Cobalt (III) Complexes on A549-Lung Cancer Cells: Targeting the Acidic Microenvironment
Source: MDPI journal article supplement (doi:10.3390/pharmaceutics14010211), 2022-01-17
Supplement: s1 [file s1]

# Supplementary Materials: Anticancer Activity of Urease Mimetic Cobalt (III) Complexes on A549-Lung Cancer Cells: Targeting the Acidic Microenvironment

Bhawna Uprety, Rahul Chandran, Charmaine Arderne and Heidi Abrahamse

## Characterization of the complexes

[Co(trien)(NO<sub>2</sub>)<sub>2</sub>]Cl (**I**): Yield: 69.1%. Selected IR bands (v<sub>max</sub>, cm<sup>-1</sup>): v(N-H): 3274, 3094; v(N-O) 1615, 1583; v(CH<sub>2</sub>) 1474, 1406; v(NO<sub>2</sub>) 1342, 1304; v(C-N) 1156; v(NH) 820, 827; v(CH<sub>2</sub>) 747. <sup>1</sup>H NMR (D<sub>2</sub>O, 400MHz): δ (ppm) 2.96 (br s, 6H, -CH<sub>2</sub>-CH<sub>2</sub>-), 3.57 (br s, 1H, NH-CH<sub>2</sub>-CH<sub>2</sub>-NH<sub>2</sub>), 4.79 (br s, 5H, NH-CH<sub>2</sub>-CH<sub>2</sub>-NH<sub>2</sub>). <sup>13</sup>C NMR (D<sub>2</sub>O + CH<sub>3</sub>OD, 400 MHz): δ (ppm) 56.84, 54.81, 41.99.

[Co(tren)(NO<sub>2</sub>)<sub>2</sub>]Cl (**II**): Yield: 67.3%. Selected IR bands (v<sub>max</sub>, cm<sup>-1</sup>): v(N-H): 3281, 3156, 3091; v(N-O) 1589; v(CH<sub>2</sub>) 1474; v(NO<sub>2</sub>) 1339, 1304; v(C-N) 1146; v(NH) 827; v(CH<sub>2</sub>) 745. UV-Vis (H<sub>2</sub>O): 438 nm (ε, 46.33 M<sup>-1</sup> cm<sup>-1</sup>), 322 nm (ε, 788 M<sup>-1</sup> cm<sup>-1</sup>). <sup>1</sup>H NMR (D<sub>2</sub>O, 400MHz): δ (ppm) 3.48–3.24 (m, 8H, -N-CH<sub>2</sub>-CH<sub>2</sub>-N-), 3.08–3.01 (m, 4H, -N-CH<sub>2</sub>-CH<sub>2</sub>-NH<sub>2</sub>). <sup>13</sup>C NMR (D<sub>2</sub>O + CH<sub>3</sub>OD, 400 MHz): δ (ppm) 62.46, 60.22, 44.43.

[Co(trien)Cl<sub>2</sub>]Cl (**III**): Yield: 94.9%. Selected IR bands (v<sub>max</sub>, cm<sup>-1</sup>): v(N-H): 3261, 3194, 3091; v(CH<sub>2</sub>) 1617, 1568; v(C-N) 1165, 1108, 1054; v(NH) 879; v(CH<sub>2</sub>) 795. <sup>1</sup>H NMR (D<sub>2</sub>O, 400MHz): δ (ppm) 2.51–2.78 (m, 4H, -NH-CH<sub>2</sub>-CH<sub>2</sub>-NH-), 2.93–3.52 (m, 8H, NH<sub>2</sub>-CH<sub>2</sub>-CH<sub>2</sub>-NH), 5.61–5.91 (m, NH<sub>2</sub>, NH). <sup>13</sup>C NMR (D<sub>2</sub>O + CH<sub>3</sub>OD, 400 MHz): δ (ppm): 57.28, 54.06, 43.05.

[Co(tren)Cl<sub>2</sub>]Cl (**IV**): Yield: 90%. Selected IR bands (v<sub>max</sub>, cm<sup>-1</sup>): v(N-H): 3234, 3135, 3081; v(CH<sub>2</sub>) 1591, 1480; v(C-N) 1160, 1032; v(NH) 896; v(CH<sub>2</sub>) 743. UV-Vis (H<sub>2</sub>O): 533 nm (ε, 561 M<sup>-1</sup> cm<sup>-1</sup>), 370 nm (ε, 385 M<sup>-1</sup> cm<sup>-1</sup>). <sup>1</sup>H NMR (D<sub>2</sub>O, 400MHz): δ (ppm). 3.60–3.56 (m, 2H, -N-CH<sub>2</sub>-CH<sub>2</sub>-N-), 3.39–3.32 (m, 4H, -N-CH<sub>2</sub>-CH<sub>2</sub>-N-), 3.25–3.22 (t, 2H, -N-CH<sub>2</sub>-CH<sub>2</sub>-N-), 2.86–2.82 (m, 2H, -N-CH<sub>2</sub>-CH<sub>2</sub>-N-), 2.74–2.70 (t, 2H, -N-CH<sub>2</sub>-CH<sub>2</sub>-N-), 5.46 (br s, NH<sub>2</sub>, NH). <sup>13</sup>C NMR (D<sub>2</sub>O + CH<sub>3</sub>OD, 400 MHz): δ (ppm) 61.04, 60.00, 44.63, 43.47.

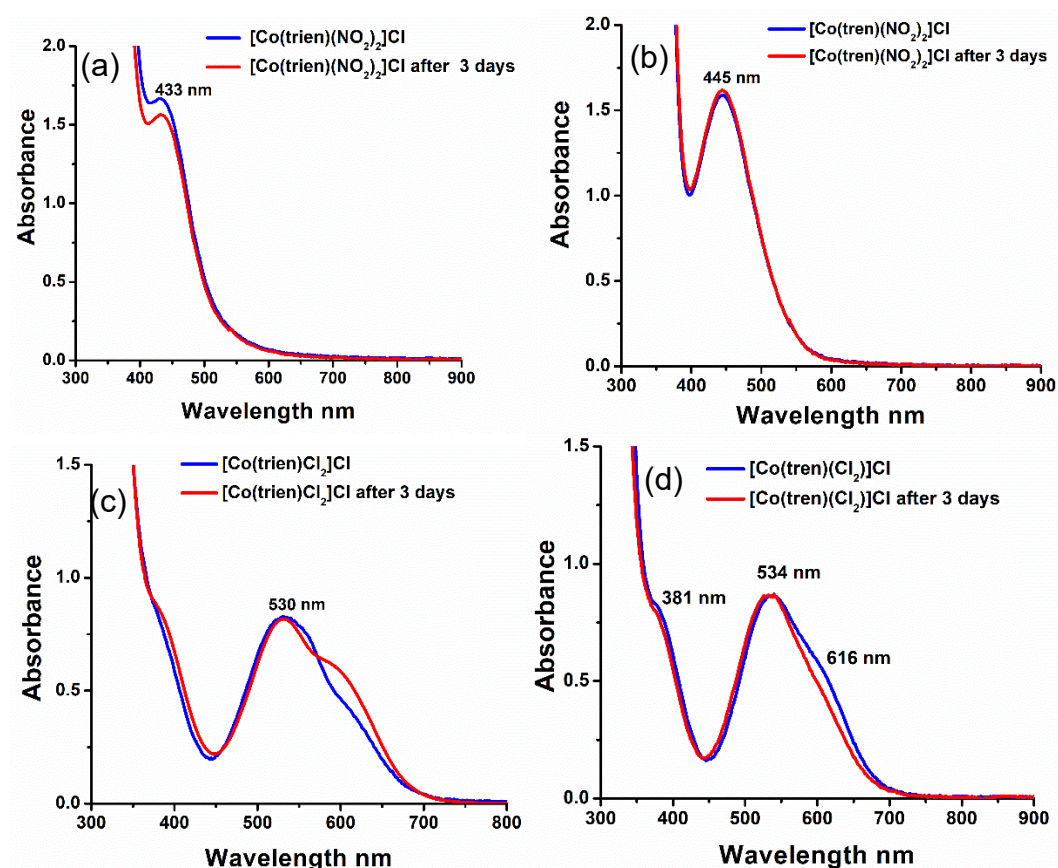

**Figure S1.** UV/Vis spectra of the cobalt (III) complexes in the cell culture media (RPMI supplemented with 10% foetal bovine serum, 1 % Penicillin-streptomycin, and 1% amphotericin-B) displaying the stability of complexes in the cell culture media.

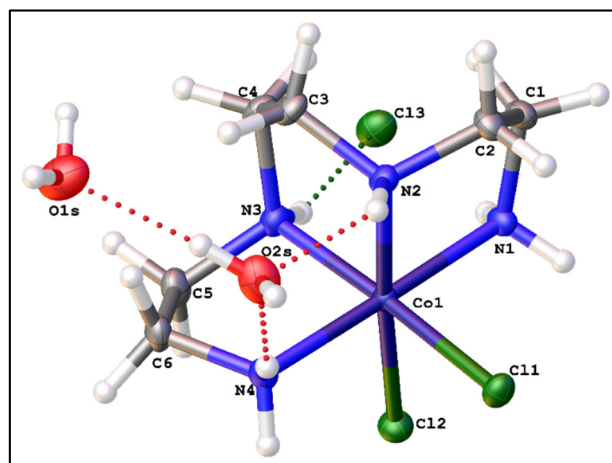

**Figure S2.** Molecular structure of [Co<sup>III</sup>(tren)Cl<sub>2</sub>]Cl·H<sub>2</sub>O with displacement ellipsoids drawn at 50% probability, showing the atomic numbering scheme where the heteroatoms have been labelled only for clarity. Dashed red and green lines indicate hydrogen bonds. The crystals were grown by slow evaporation of a solution of [Co(tren)Cl<sub>2</sub>]Cl in RPMI supplemented with 10% foetal bovine serum, 1% Penicillin-streptomycin, and 1 % amphotericin-B.

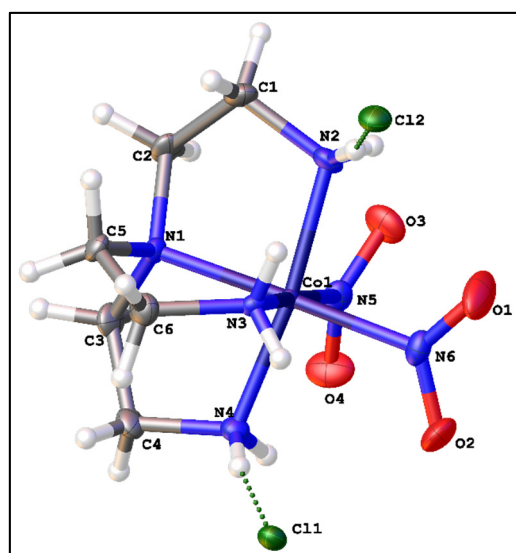

**Figure S3.** Molecular structure of [Co<sup>III</sup>(tren)(NO<sub>2</sub>)<sub>2</sub>]Cl with displacement ellipsoids drawn at 50% probability, showing the atomic numbering scheme where the heteroatoms have been labelled only for clarity. Dashed red and green lines indicate hydrogen bonds. The crystals were grown by slow evaporation of a solution of [Co(tren)(NO<sub>2</sub>)<sub>2</sub>]Cl in RPMI supplemented with 10% foetal bovine serum, 1% Penicillin-streptomycin, and 1% amphotericin-B.

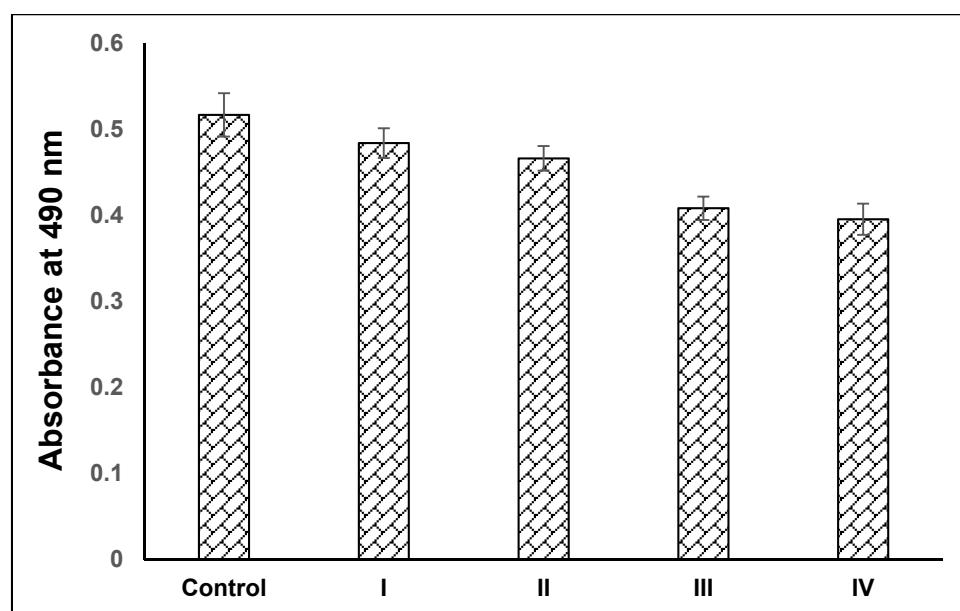

**Figure S4.** LDH levels of WS1 cells treated with 32  $\mu$ M of each of the cobalt complexes. The results were non-significant at  $p < 0.05$  compared to control representing the safety of the Co (III) complexes against WS1 cells.

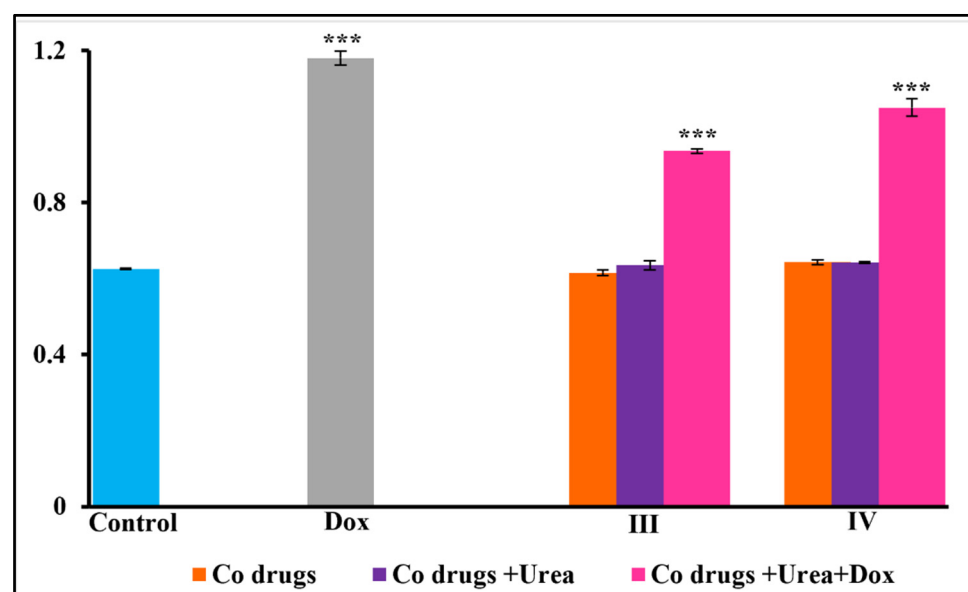

**Figure S5.** LDH levels of MCF7 cells. [Co drugs]: 32  $\mu$ M, [urea]: 2mM, [Dox]: 50 nM. Increase in LDH levels can be seen in combination groups compared to control but not as effective as Doxorubicin. The data represent the mean  $\pm$  SEM. Results are significantly different at \*\*\*  $p < 0.001$  when compared to control and doxorubicin.

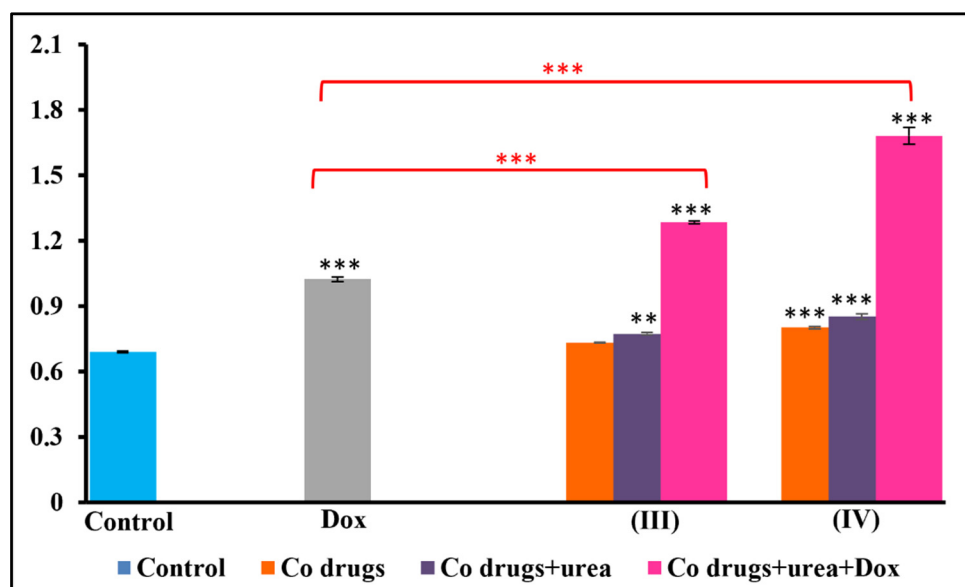

**Figure S6.** LDH levels of HKESC-1 cells. [Co drugs]: 32  $\mu$ M, [urea]: 2mM, [Dox]: 50 nM. Prominent increase in LDH levels can be clearly seen here in groups treated with complex combinations compared to control and doxorubicin. The data represent the mean  $\pm$  SEM. Results are significantly different at \*\*  $p < 0.01$  and \*\*\*  $p < 0.001$  when compared to control and doxorubicin.

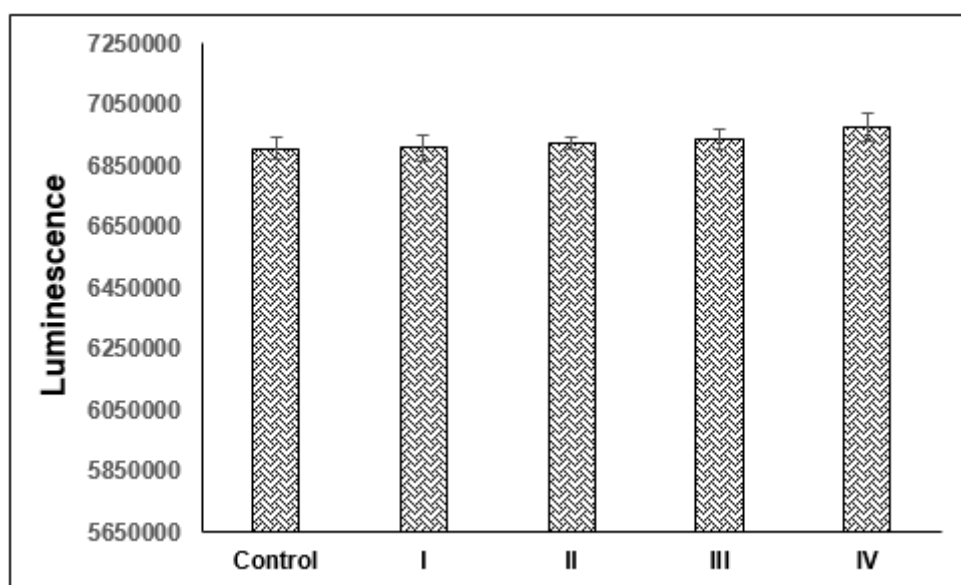

**Figure S7.** ATP metabolism in WS1 cells treated with 32  $\mu$ M of each of the cobalt complexes. The results were non-significant at  $p < 0.05$  compared to control representing the safety of the Co (III) complexes against WS1 cells.

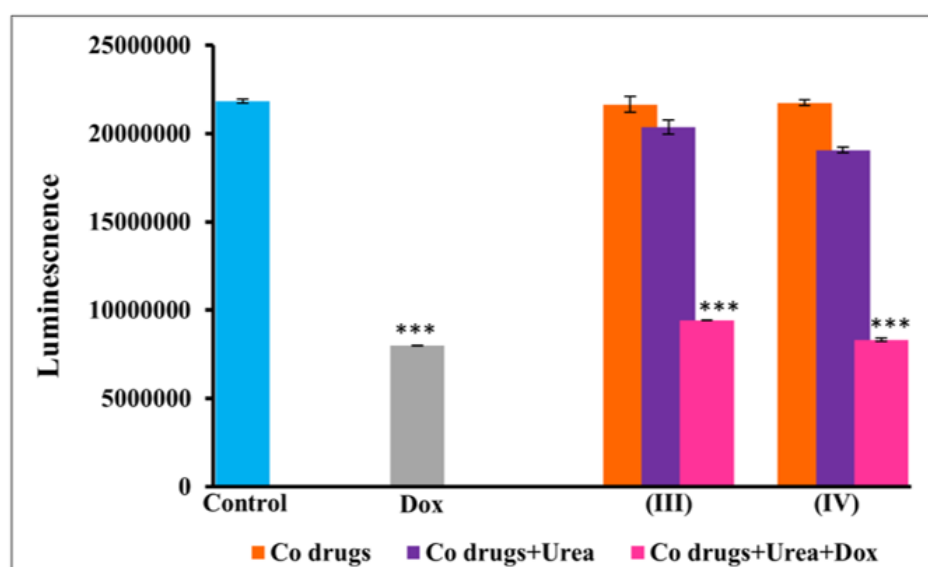

**Figure S8.** ATP proliferation of MCF7 cells. [Co drugs]: 32  $\mu$ M, [urea]: 2mM, [Dox]: 50 nM. Similar effects can be seen as observed in LDH assay with more cell death induced by complex combinations thereby lowering ATP levels.

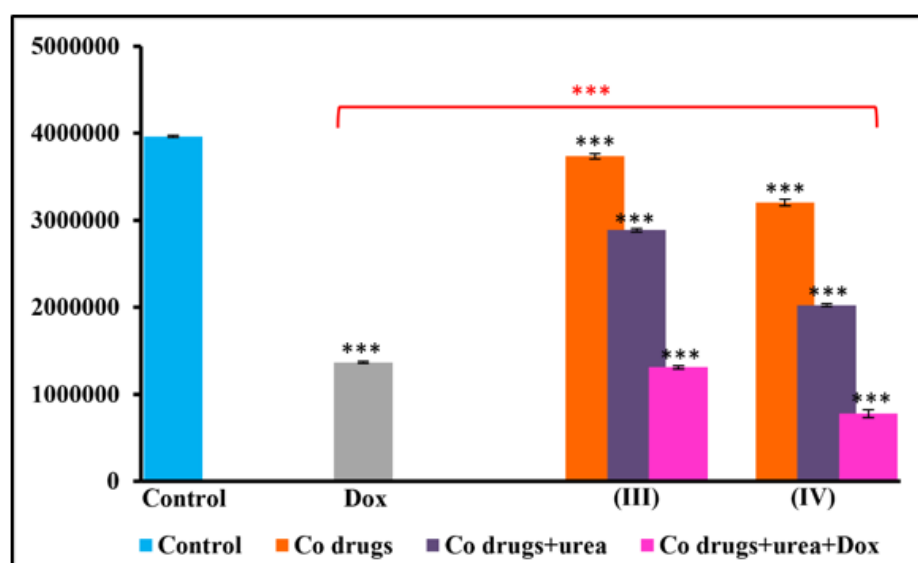

**Figure S9.** ATP proliferation of HKESC-1 cells. [Co drugs]: 32  $\mu$ M, [urea]: 2mM, [Dox]: 50 nM.



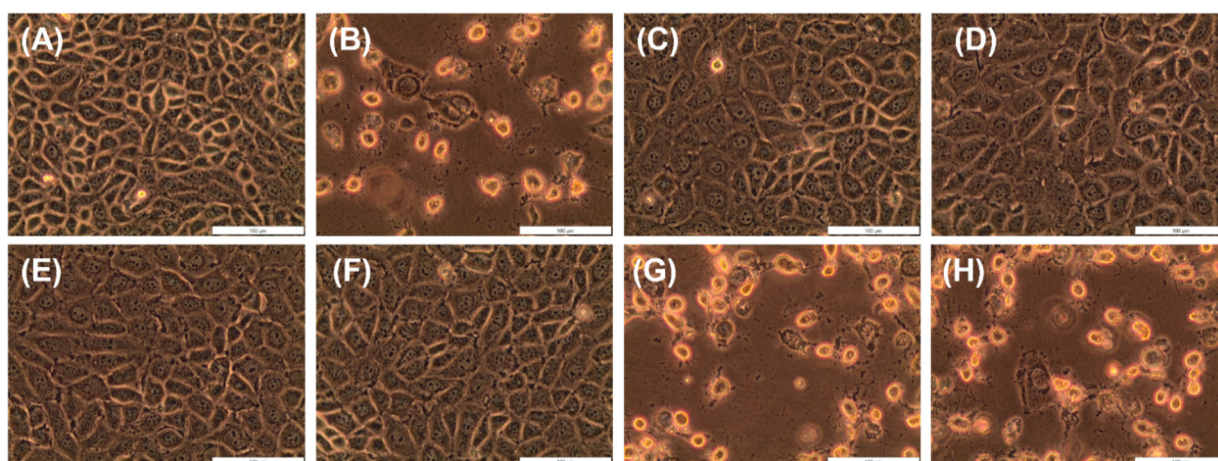

**Figure S10.** Morphology of MCF7 treated with cobalt complexes, urea and doxorubicin. (A) Control; (B) Dox (50 nM); (C) 32  $\mu$ M (III); (D) 32  $\mu$ M (IV); (E) 32  $\mu$ M (III)+2mM urea; (F) 32  $\mu$ M (IV) + 2 mM urea; (G) 32  $\mu$ M (III) + 2 mM urea + 50 nM Dox; (H) 32  $\mu$ M (IV) + 2 mM urea + 50 nM Dox.

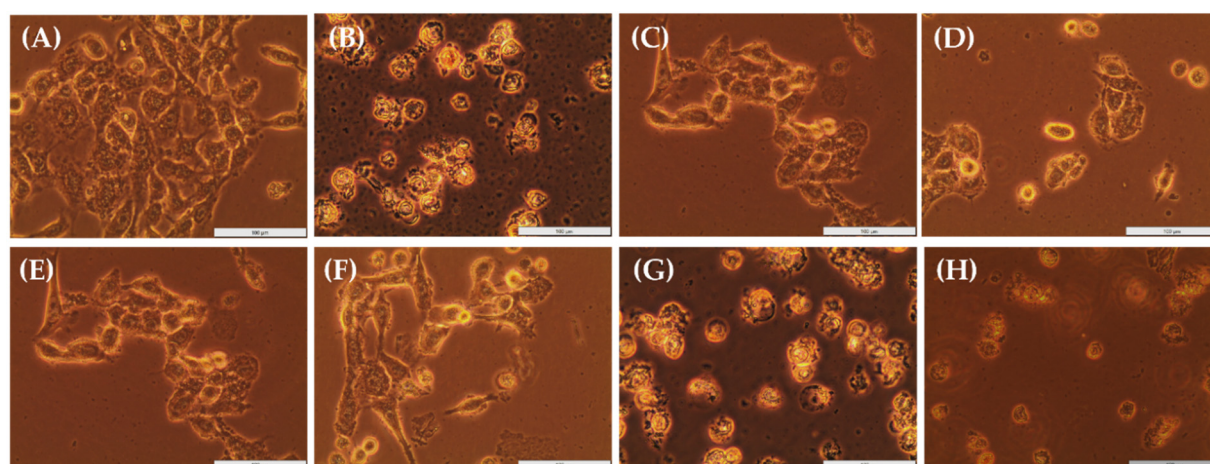

**Figure S11.** Morphology of HKESC-1 treated with cobalt complexes, urea and doxorubicin. (A) Control; (B) Dox (50 nM); (C) 32  $\mu$ M (III); (D) 32  $\mu$ M (IV); (E) 32  $\mu$ M (III)+2mM urea; (F) 32  $\mu$ M (IV) + 2 mM urea; (G) 32  $\mu$ M (III) + 2 mM urea + 50 nM Dox; (H) 32  $\mu$ M (IV) + 2 mM urea + 50 nM Dox. Signs of cell death with rounding and detachment of cells is evident in the images of treatment groups. Scale bar: 100 $\mu$ m.
